# Supplementary material
Source: publisher site journal article supplement (https://www.dovepress.com/article/541052)
Supplement: Supplementary file 1 [file Appendix_V2_JS2_LMP.docx]

# Appendix

# Appendix 1 : Performance of all the traditional algorithms tested for identifying mTBI cases defined with the ‘narrow’ definition (i.e., ‘certain’ cases only)

| **ICD algorithm** | **True positives** | **False negatives** | **False positives** | **True negatives** | **Sensitivity** | **Specificity** | **PPV** | **NPV** |
| --- | --- | --- | --- | --- | --- | --- | --- | --- |
|  | **(n)** | **(n)** | **(n)** | **(n)** | **% (95% CI)** | **% (95% CI)** | **% (95% CI)** | **% (95% CI)** |
| AlgoS060 | 15 | 29 | 126 | 5015 | 34.1 (20.5-49.9) | 97.5 (97.1-98) | 10.6 (6.1-16.9) | 99.4 (99.2-99.6) |
| BA1 | 16 | 28 | 126 | 5015 | 36.4 (22.4-52.2) | 97.5 (97.1-98) | 11.3 (6.6-17.7) | 99.4 (99.2-99.6) |
| BA2 | 16 | 28 | 131 | 5010 | 36.4 (22.4-52.2) | 97.5 (97-97.9) | 10.9 (6.4-17.1) | 99.4 (99.2-99.6) |
| BA3 | 15 | 29 | 129 | 5012 | 34.1 (20.5-49.9) | 97.5 (97-97.9) | 10.4 (6-16.6) | 99.4 (99.2-99.6) |
| BA4 | 15 | 29 | 139 | 5002 | 34.1 (20.5-49.9) | 97.3 (96.8-97.7) | 9.7 (5.6-15.6) | 99.4 (99.2-99.6) |
| BA5 | 16 | 28 | 144 | 4997 | 36.4 (22.4-52.2) | 97.2 (96.7-97.6) | 10 (5.8-15.7) | 99.4 (99.2-99.6) |
| **BA6** | **17** | **27** | **131** | **5010** | **38.6 (24.4-54.5)** | **97.5 (97-97.9)** | **11.5 (6.8-17.8)** | **99.5 (99.2-99.7)** |
| BA7 | 16 | 28 | 129 | 5012 | 36.4 (22.4-52.2) | 97.5 (97-97.9) | 11 (6.4-17.3) | 99.4 (99.2-99.6) |
| BA8 | 16 | 28 | 139 | 5002 | 36.4 (22.4-52.2) | 97.3 (96.8-97.7) | 10.3 (6-16.2) | 99.4 (99.2-99.6) |
| BA9 | 17 | 27 | 144 | 4997 | 38.6 (24.4-54.5) | 97.2 (96.7-97.6) | 10.6 (6.3-16.4) | 99.5 (99.2-99.7) |
| BA10 | 17 | 27 | 149 | 4992 | 38.6 (24.4-54.5) | 97.1 (96.6-97.5) | 10.2 (6.1-15.9) | 99.5 (99.2-99.7) |
| BA11 | 16 | 28 | 134 | 5007 | 36.4 (22.4-52.2) | 97.4 (96.9-97.8) | 10.7 (6.2-16.7) | 99.4 (99.2-99.6) |
| BA12 | 16 | 28 | 144 | 4997 | 36.4 (22.4-52.2) | 97.2 (96.7-97.6) | 10 (5.8-15.7) | 99.4 (99.2-99.6) |
| BA13 | 16 | 28 | 157 | 4984 | 36.4 (22.4-52.2) | 96.9 (96.4-97.4) | 9.2 (5.4-14.6) | 99.4 (99.2-99.6) |
| BA14 | 16 | 28 | 147 | 4994 | 36.4 (22.4-52.2) | 97.1 (96.7-97.6) | 9.8 (5.7-15.5) | 99.4 (99.2-99.6) |
| BA15 | 15 | 29 | 142 | 4999 | 34.1 (20.5-49.9) | 97.2 (96.8-97.7) | 9.6 (5.5-15.3) | 99.4 (99.2-99.6) |
| BA16 | 18 | 26 | 149 | 4992 | 40.9 (26.3-56.8) | 97.1 (96.6-97.5) | 10.8 (6.5-16.5) | 99.5 (99.2-99.7) |
| BA17 | 17 | 27 | 134 | 5007 | 38.6 (24.4-54.5) | 97.4 (96.9-97.8) | 11.3 (6.7-17.4) | 99.5 (99.2-99.7) |
| BA18 | 17 | 27 | 144 | 4997 | 38.6 (24.4-54.5) | 97.2 (96.7-97.6) | 10.6 (6.3-16.4) | 99.5 (99.2-99.7) |
| BA19 | 17 | 27 | 157 | 4984 | 38.6 (24.4-54.5) | 96.9 (96.4-97.4) | 9.8 (5.8-15.2) | 99.5 (99.2-99.6) |
| BA20 | 17 | 27 | 147 | 4994 | 38.6 (24.4-54.5) | 97.1 (96.7-97.6) | 10.4 (6.2-16.1) | 99.5 (99.2-99.7) |
| BA21 | 16 | 28 | 142 | 4999 | 36.4 (22.4-52.2) | 97.2 (96.8-97.7) | 10.1 (5.9-15.9) | 99.4 (99.2-99.6) |
| BA22 | 17 | 27 | 162 | 4979 | 38.6 (24.4-54.5) | 96.8 (96.3-97.3) | 9.5 (5.6-14.8) | 99.5 (99.2-99.6) |
| BA23 | 17 | 27 | 152 | 4989 | 38.6 (24.4-54.5) | 97 (96.5-97.5) | 10.1 (6-15.6) | 99.5 (99.2-99.6) |
| BA24 | 16 | 28 | 147 | 4994 | 36.4 (22.4-52.2) | 97.1 (96.7-97.6) | 9.8 (5.7-15.5) | 99.4 (99.2-99.6) |
| BA25 | 16 | 28 | 160 | 4981 | 36.4 (22.4-52.2) | 96.9 (96.4-97.4) | 9.1 (5.3-14.3) | 99.4 (99.2-99.6) |
| BA26 | 18 | 26 | 162 | 4979 | 40.9 (26.3-56.8) | 96.8 (96.3-97.3) | 10 (6-15.3) | 99.5 (99.2-99.7) |
| BA27 | 18 | 26 | 152 | 4989 | 40.9 (26.3-56.8) | 97 (96.5-97.5) | 10.6 (6.4-16.2) | 99.5 (99.2-99.7) |
| BA28 | 17 | 27 | 147 | 4994 | 38.6 (24.4-54.5) | 97.1 (96.7-97.6) | 10.4 (6.2-16.1) | 99.5 (99.2-99.7) |
| BA29 | 17 | 27 | 160 | 4981 | 38.6 (24.4-54.5) | 96.9 (96.4-97.4) | 9.6 (5.7-14.9) | 99.5 (99.2-99.6) |
| BA30 | 17 | 27 | 165 | 4976 | 38.6 (24.4-54.5) | 96.8 (96.3-97.3) | 9.3 (5.5-14.5) | 99.5 (99.2-99.6) |
| BA31 | 18 | 26 | 165 | 4976 | 40.9 (26.3-56.8) | 96.8 (96.3-97.3) | 9.8 (5.9-15.1) | 99.5 (99.2-99.7) |

# The best algorithm is shown in bold.

# Appendix 2 : Performance of all the traditional algorithms tested for identifying mTBI cases defined with the ‘moderately broad’ definition (i.e., ‘certain’ and ‘probable’ cases)

| **ICD algorithm** | **True positives** | **False negatives** | **False positives** | **True negatives** | **Sensitivity** | **Specificity** | **PPV** | **NPV** |
| --- | --- | --- | --- | --- | --- | --- | --- | --- |
|  | **(n)** | **(n)** | **(n)** | **(n)** | **% (95% CI)** | **% (95% CI)** | **% (95% CI)** | **% (95% CI)** |
| AlgoS060 | 49 | 101 | 92 | 4943 | 32.7 (25.2-40.8) | 98.2 (97.8-98.5) | 34.8 (26.9-43.2) | 98 (97.6-98.4) |
| BA1 | 50 | 100 | 92 | 4943 | 33.3 (25.9-41.5) | 98.2 (97.8-98.5) | 35.2 (27.4-43.7) | 98 (97.6-98.4) |
| BA2 | 52 | 98 | 95 | 4940 | 34.7 (27.1-42.9) | 98.1 (97.7-98.5) | 35.4 (27.7-43.7) | 98.1 (97.6-98.4) |
| BA3 | 50 | 100 | 94 | 4941 | 33.3 (25.9-41.5) | 98.1 (97.7-98.5) | 34.7 (27-43.1) | 98 (97.6-98.4) |
| BA4 | 53 | 97 | 101 | 4934 | 35.3 (27.7-43.6) | 98 (97.6-98.4) | 34.4 (27-42.5) | 98.1 (97.7-98.4) |
| BA5 | 54 | 96 | 106 | 4929 | 36 (28.3-44.2) | 97.9 (97.5-98.3) | 33.8 (26.5-41.6) | 98.1 (97.7-98.5) |
| BA6 | 53 | 97 | 95 | 4940 | 35.3 (27.7-43.6) | 98.1 (97.7-98.5) | 35.8 (28.1-44.1) | 98.1 (97.7-98.4) |
| BA7 | 51 | 99 | 94 | 4941 | 34 (26.5-42.2) | 98.1 (97.7-98.5) | 35.2 (27.4-43.5) | 98 (97.6-98.4) |
| BA8 | 54 | 96 | 101 | 4934 | 36 (28.3-44.2) | 98 (97.6-98.4) | 34.8 (27.4-42.9) | 98.1 (97.7-98.5) |
| BA9 | 55 | 95 | 106 | 4929 | 36.7 (29-44.9) | 97.9 (97.5-98.3) | 34.2 (26.9-42) | 98.1 (97.7-98.5) |
| BA10 | 57 | 93 | 109 | 4926 | 38 (30.2-46.3) | 97.8 (97.4-98.2) | 34.3 (27.2-42.1) | 98.1 (97.7-98.5) |
| BA11 | 53 | 97 | 97 | 4938 | 35.3 (27.7-43.6) | 98.1 (97.7-98.4) | 35.3 (27.7-43.6) | 98.1 (97.7-98.4) |
| BA12 | 56 | 94 | 104 | 4931 | 37.3 (29.6-45.6) | 97.9 (97.5-98.3) | 35 (27.6-42.9) | 98.1 (97.7-98.5) |
| BA13 | 58 | 92 | 115 | 4920 | 38.7 (30.8-47) | 97.7 (97.3-98.1) | 33.5 (26.5-41.1) | 98.2 (97.8-98.5) |
| BA14 | 55 | 95 | 108 | 4927 | 36.7 (29-44.9) | 97.9 (97.4-98.2) | 33.7 (26.5-41.6) | 98.1 (97.7-98.5) |
| BA15 | 54 | 96 | 103 | 4932 | 36 (28.3-44.2) | 98 (97.5-98.3) | 34.4 (27-42.4) | 98.1 (97.7-98.5) |
| BA16 | 58 | 92 | 109 | 4926 | 38.7 (30.8-47) | 97.8 (97.4-98.2) | 34.7 (27.5-42.5) | 98.2 (97.8-98.5) |
| **BA17** | **54** | **96** | **97** | **4938** | **36 (28.3-44.2)** | **98.1 (97.7-98.4)** | **35.8 (28.1-44)** | **98.1 (97.7-98.5)** |
| BA18 | 57 | 93 | 104 | 4931 | 38 (30.2-46.3) | 97.9 (97.5-98.3) | 35.4 (28-43.3) | 98.1 (97.7-98.5) |
| BA19 | 59 | 91 | 115 | 4920 | 39.3 (31.5-47.6) | 97.7 (97.3-98.1) | 33.9 (26.9-41.5) | 98.2 (97.8-98.5) |
| BA20 | 56 | 94 | 108 | 4927 | 37.3 (29.6-45.6) | 97.9 (97.4-98.2) | 34.1 (26.9-42) | 98.1 (97.7-98.5) |
| BA21 | 55 | 95 | 103 | 4932 | 36.7 (29-44.9) | 98 (97.5-98.3) | 34.8 (27.4-42.8) | 98.1 (97.7-98.5) |
| BA22 | 61 | 89 | 118 | 4917 | 40.7 (32.7-49) | 97.7 (97.2-98.1) | 34.1 (27.2-41.5) | 98.2 (97.8-98.6) |
| BA23 | 58 | 92 | 111 | 4924 | 38.7 (30.8-47) | 97.8 (97.4-98.2) | 34.3 (27.2-42) | 98.2 (97.8-98.5) |
| BA24 | 57 | 93 | 106 | 4929 | 38 (30.2-46.3) | 97.9 (97.5-98.3) | 35 (27.7-42.8) | 98.1 (97.7-98.5) |
| BA25 | 62 | 88 | 118 | 4917 | 41.3 (33.4-49.7) | 97.7 (97.2-98.1) | 34.4 (27.5-41.9) | 98.2 (97.8-98.6) |
| BA26 | 59 | 91 | 117 | 4918 | 39.3 (31.5-47.6) | 97.7 (97.2-98.1) | 33.5 (26.6-41) | 98.2 (97.8-98.5) |
| BA27 | 59 | 91 | 111 | 4924 | 39.3 (31.5-47.6) | 97.8 (97.4-98.2) | 34.7 (27.6-42.4) | 98.2 (97.8-98.5) |
| BA28 | 58 | 92 | 106 | 4929 | 38.7 (30.8-47) | 97.9 (97.5-98.3) | 35.4 (28.1-43.2) | 98.2 (97.8-98.5) |
| BA29 | 60 | 90 | 117 | 4918 | 40 (32.1-48.3) | 97.7 (97.2-98.1) | 33.9 (27-41.4) | 98.2 (97.8-98.6) |
| BA30 | 62 | 88 | 120 | 4915 | 41.3 (33.4-49.7) | 97.6 (97.2-98) | 34.1 (27.2-41.4) | 98.2 (97.8-98.6) |
| BA31 | 63 | 87 | 120 | 4915 | 42 (34-50.3) | 97.6 (97.2-98) | 34.4 (27.6-41.8) | 98.3 (97.9-98.6) |

# The best algorithm is shown in bold.

# Appendix 3 : Performance of all the traditional algorithms tested for identifying mTBI cases defined with the ‘broad’ definition (i.e., ‘certain’, ‘probable’ and ‘possible’ cases)

| **ICD algorithm** | **True positives** | **False negatives** | **False positives** | **True negatives** | **Sensitivity** | **Specificity** | **PPV** | **NPV** |
| --- | --- | --- | --- | --- | --- | --- | --- | --- |
|  | **(n)** | **(n)** | **(n)** | **(n)** | **% (95% CI)** | **% (95% CI)** | **% (95% CI)** | **% (95% CI)** |
| AlgoS060 | 129 | 399 | 12 | 4645 | 24.4 (20.8-28.3) | 99.7 (99.6-99.9) | 91.5 (85.6-95.5) | 92.1 (91.3-92.8) |
| BA1 | 130 | 398 | 12 | 4645 | 24.6 (21-28.5) | 99.7 (99.6-99.9) | 91.5 (85.7-95.6) | 92.1 (91.3-92.8) |
| BA2 | 134 | 394 | 13 | 4644 | 25.4 (21.7-29.3) | 99.7 (99.5-99.9) | 91.2 (85.4-95.2) | 92.2 (91.4-92.9) |
| BA3 | 132 | 396 | 12 | 4645 | 25 (21.4-28.9) | 99.7 (99.6-99.9) | 91.7 (85.9-95.6) | 92.1 (91.4-92.9) |
| BA4 | 142 | 386 | 12 | 4645 | 26.9 (23.2-30.9) | 99.7 (99.6-99.9) | 92.2 (86.8-95.9) | 92.3 (91.6-93.1) |
| BA5 | 148 | 380 | 12 | 4645 | 28 (24.2-32.1) | 99.7 (99.6-99.9) | 92.5 (87.3-96.1) | 92.4 (91.7-93.2) |
| BA6 | 135 | 393 | 13 | 4644 | 25.6 (21.9-29.5) | 99.7 (99.5-99.9) | 91.2 (85.5-95.2) | 92.2 (91.4-92.9) |
| BA7 | 133 | 395 | 12 | 4645 | 25.2 (21.5-29.1) | 99.7 (99.6-99.9) | 91.7 (86-95.7) | 92.2 (91.4-92.9) |
| BA8 | 143 | 385 | 12 | 4645 | 27.1 (23.3-31.1) | 99.7 (99.6-99.9) | 92.3 (86.9-95.9) | 92.3 (91.6-93.1) |
| BA9 | 149 | 379 | 12 | 4645 | 28.2 (24.4-32.3) | 99.7 (99.6-99.9) | 92.5 (87.3-96.1) | 92.5 (91.7-93.2) |
| BA10 | 153 | 375 | 13 | 4644 | 29 (25.1-33.1) | 99.7 (99.5-99.9) | 92.2 (87-95.8) | 92.5 (91.8-93.2) |
| BA11 | 137 | 391 | 13 | 4644 | 25.9 (22.3-29.9) | 99.7 (99.5-99.9) | 91.3 (85.6-95.3) | 92.2 (91.5-93) |
| BA12 | 147 | 381 | 13 | 4644 | 27.8 (24.1-31.9) | 99.7 (99.5-99.9) | 91.9 (86.5-95.6) | 92.4 (91.7-93.1) |
| BA13 | 161 | 367 | 12 | 4645 | 30.5 (26.6-34.6) | 99.7 (99.6-99.9) | 93.1 (88.2-96.4) | 92.7 (91.9-93.4) |
| BA14 | 151 | 377 | 12 | 4645 | 28.6 (24.8-32.7) | 99.7 (99.6-99.9) | 92.6 (87.5-96.1) | 92.5 (91.7-93.2) |
| BA15 | 145 | 383 | 12 | 4645 | 27.5 (23.7-31.5) | 99.7 (99.6-99.9) | 92.4 (87-96) | 92.4 (91.6-93.1) |
| BA16 | 154 | 374 | 13 | 4644 | 29.2 (25.3-33.3) | 99.7 (99.5-99.9) | 92.2 (87.1-95.8) | 92.5 (91.8-93.3) |
| BA17 | 138 | 390 | 13 | 4644 | 26.1 (22.4-30.1) | 99.7 (99.5-99.9) | 91.4 (85.7-95.3) | 92.3 (91.5-93) |
| BA18 | 148 | 380 | 13 | 4644 | 28 (24.2-32.1) | 99.7 (99.5-99.9) | 91.9 (86.6-95.6) | 92.4 (91.7-93.2) |
| BA19 | 162 | 366 | 12 | 4645 | 30.7 (26.8-34.8) | 99.7 (99.6-99.9) | 93.1 (88.3-96.4) | 92.7 (91.9-93.4) |
| BA20 | 152 | 376 | 12 | 4645 | 28.8 (25-32.9) | 99.7 (99.6-99.9) | 92.7 (87.6-96.2) | 92.5 (91.8-93.2) |
| BA21 | 146 | 382 | 12 | 4645 | 27.7 (23.9-31.7) | 99.7 (99.6-99.9) | 92.4 (87.1-96) | 92.4 (91.6-93.1) |
| BA22 | 166 | 362 | 13 | 4644 | 31.4 (27.5-35.6) | 99.7 (99.5-99.9) | 92.7 (87.9-96.1) | 92.8 (92-93.5) |
| BA23 | 156 | 372 | 13 | 4644 | 29.5 (25.7-33.6) | 99.7 (99.5-99.9) | 92.3 (87.2-95.8) | 92.6 (91.8-93.3) |
| BA24 | 150 | 378 | 13 | 4644 | 28.4 (24.6-32.5) | 99.7 (99.5-99.9) | 92 (86.8-95.7) | 92.5 (91.7-93.2) |
| BA25 | 167 | 361 | 13 | 4644 | 31.6 (27.7-35.8) | 99.7 (99.5-99.9) | 92.8 (88-96.1) | 92.8 (92-93.5) |
| BA26 | 164 | 364 | 12 | 4645 | 31.1 (27.1-35.2) | 99.7 (99.6-99.9) | 93.2 (88.4-96.4) | 92.7 (92-93.4) |
| BA27 | 157 | 371 | 13 | 4644 | 29.7 (25.9-33.8) | 99.7 (99.5-99.9) | 92.4 (87.3-95.9) | 92.6 (91.8-93.3) |
| BA28 | 151 | 377 | 13 | 4644 | 28.6 (24.8-32.7) | 99.7 (99.5-99.9) | 92.1 (86.8-95.7) | 92.5 (91.7-93.2) |
| BA29 | 165 | 363 | 12 | 4645 | 31.3 (27.3-35.4) | 99.7 (99.6-99.9) | 93.2 (88.5-96.5) | 92.8 (92-93.5) |
| BA30 | 169 | 359 | 13 | 4644 | 32 (28-36.2) | 99.7 (99.5-99.9) | 92.9 (88.1-96.1) | 92.8 (92.1-93.5) |
| **BA31** | **170** | **358** | **13** | **4644** | **32.2 (28.2-36.4)** | **99.7 (99.5-99.9)** | **92.9 (88.2-96.2)** | **92.8 (92.1-93.5)** |

# The best algorithm is shown in bold.

# Appendix 4 : ICD-10 codes coded in OSCOUR® for the 27 false negatives associated with the BA6 algorithm when used to identify mTBI cases defined with the ‘narrow’ definition

| **ICD-10 codes** | **Label** | **count** | **percent** |
| --- | --- | --- | --- |
| S000 | Superficial injury of scalp | 4 | 15% |
| S007 | Multiple superficial injuries of head | 2 | 7% |
| S061 | Traumatic cerebral oedema | 2 | 7% |
| G439 | Migraine, unspecified | 1 | 4% |
| G938 | Other specified disorders of brain | 1 | 4% |
| G952 | Other and unspecified cord compression | 1 | 4% |
| I608 | Other nontraumatic subarachnoid haemorrhage | 1 | 4% |
| R262 | Difficulty in walking, not elsewhere classified | 1 | 4% |
| R296 | Repeated falls | 1 | 4% |
| R402 | Coma | 1 | 4% |
| R410 | Disorientation, unspecified | 1 | 4% |
| R51 | Headache | 1 | 4% |
| S009 | Superficial injury of head, part unspecified | 1 | 4% |
| S010 | Open wound of scalp | 1 | 4% |
| S011 | Open wound of eyelid and periocular area | 1 | 4% |
| S015 | Open wound of lip and oral cavity | 1 | 4% |
| S065 | Traumatic subdural haemorrhage | 1 | 4% |
| S066 | Traumatic subarachnoid haemorrhage | 1 | 4% |
| S069 | Intracranial injury, unspecified | 1 | 4% |
| S092 | Traumatic rupture of ear drum | 1 | 4% |
| S134 | Sprain of ligaments of cervical spine | 1 | 4% |
| S301 | Contusion of abdominal wall | 1 | 4% |
| S400 | Contusion of shoulder and upper arm | 1 | 4% |
| S525 | Fracture of lower end of radius | 1 | 4% |

# Appendix 5 : ICD-10 codes coded in OSCOUR® for the 96 false negatives associated with the BA17 algorithm when used to identify mTBI cases defined with the ‘moderately broad’ definition

| **ICD-10 codes** | **Label** | **count** | **percent** |
| --- | --- | --- | --- |
| F100 | Mental and behavioural disorders due to use of alcohol | 11 | 11% |
| S000 | Superficial injury of scalp | 6 | 6% |
| S069 | Intracranial injury, unspecified | 5 | 5% |
| M542 | Cervicalgia | 4 | 4% |
| R51 | Headache | 4 | 4% |
| S098 | Other specified injuries of head | 4 | 4% |
| S134 | Sprain of ligaments of cervical spine | 4 | 4% |
| R262 | Difficulty in walking, not elsewhere classified | 3 | 3% |
| R55 | Syncope and collapse | 3 | 3% |
| S022 | Fracture of nasal bones | 3 | 3% |
| G409 | Epilepsy, unspecified | 2 | 2% |
| R53+ | Malaise and fatigue | 2 | 2% |
| R568 | Other and unspecified convulsions | 2 | 2% |
| S003 | Superficial injury of nose | 2 | 2% |
| S007 | Multiple superficial injuries of head | 2 | 2% |
| S009 | Superficial injury of head, part unspecified | 2 | 2% |
| S061 | Traumatic cerebral oedema | 2 | 2% |
| S400 | Contusion of shoulder and upper arm | 2 | 2% |
| F103 | Mental and behavioural disorders due to use of alcohol Withdrawal state | 1 | 1% |
| G404 | Other generalized epilepsy and epileptic syndromes | 1 | 1% |
| G408 | Other epilepsy and recurrent seizures | 1 | 1% |
| G439 | Migraine, unspecified | 1 | 1% |
| G452 | Multiple and bilateral precerebral artery syndromes | 1 | 1% |
| G938 | Other specified disorders of brain | 1 | 1% |
| G952 | Other and unspecified cord compression | 1 | 1% |
| I608 | Other non-traumatic subarachnoid haemorrhage | 1 | 1% |
| I639 | Cerebral infarction, unspecified | 1 | 1% |
| J180 | Bronchopneumonia, unspecified organism | 1 | 1% |
| M009 | Pyogenic arthritis, unspecified | 1 | 1% |
| M796 | Pain in limb, hand, foot, fingers and toes. | 1 | 1% |
| N178 | Other acute kidney failure | 1 | 1% |
| N410 | Acute prostatitis | 1 | 1% |
| R060 | Dyspnoea | 1 | 1% |
| R104 | Other and unspecified abdominal pain | 1 | 1% |
| R11 | Nausea and vomiting | 1 | 1% |
| R296 | Repeated falls | 1 | 1% |
| R33 | Retention of urine | 1 | 1% |
| R402 | Coma | 1 | 1% |
| R410 | Disorientation, unspecified | 1 | 1% |
| R579 | Shock, unspecified | 1 | 1% |
| R651 | Systemic inflammatory response syndrome of non-infectious origin | 1 | 1% |
| S008 | Superficial injury of other parts of head | 1 | 1% |
| S010 | Open wound of scalp | 1 | 1% |
| S011 | Open wound of eyelid and periocular area | 1 | 1% |
| S015 | Open wound of lip and oral cavity | 1 | 1% |
| S018 | Open wound of other parts of head | 1 | 1% |
| S019 | Open wound of head, part unspecified | 1 | 1% |
| S023 | Fracture of orbital floor | 1 | 1% |
| S065 | Traumatic subdural haemorrhage | 1 | 1% |
| S066 | Traumatic subarachnoid haemorrhage | 1 | 1% |
| S071 | Crushing injury of skull | 1 | 1% |
| S092 | Traumatic rupture of ear drum | 1 | 1% |
| S129 | Fracture of neck, unspecified | 1 | 1% |
| S202 | Contusion of thorax | 1 | 1% |
| S300 | Contusion of lower back and pelvis | 1 | 1% |
| S301 | Contusion of abdominal wall | 1 | 1% |
| S360 | Injury of spleen | 1 | 1% |
| S422 | Fracture of upper end of humerus | 1 | 1% |
| S423 | Fracture of shaft of humerus | 1 | 1% |
| S429 | Fracture of shoulder girdle, part unspecified | 1 | 1% |
| S501 | Contusion of forearm | 1 | 1% |
| S525 | Fracture of lower end of radius | 1 | 1% |
| S720 | Fracture of head and neck of femur | 1 | 1% |
| S834 | Sprain of collateral ligament of knee | 1 | 1% |
| Z532 | Procedure and treatment not carried out because of patient's decision for other and unspecified reasons | 1 | 1% |

# Appendix 6 : ICD-10 codes coded in OSCOUR® for the 358 false negatives associated with the BA31 algorithm when used to identify mTBI cases defined with the ‘broad’ definition

| **ICD-10 codes** | **Label** | **count** | **percent** |
| --- | --- | --- | --- |
| S018 | Open wound of other parts of head | 39 | 11% |
| S010 | Open wound of scalp | 26 | 7% |
| F100 | Mental and behavioural disorders due to use of alcohol | 20 | 6% |
| S011 | Open wound of eyelid and periocular area | 17 | 5% |
| S015 | Open wound of lip and oral cavity | 17 | 5% |
| S000 | Superficial injury of scalp | 16 | 4% |
| S019 | Open wound of head, part unspecified | 14 | 4% |
| S003 | Superficial injury of nose | 11 | 3% |
| M542 | Cervicalgia | 10 | 3% |
| S134 | Sprain of ligaments of cervical spine | 8 | 2% |
| S008 | Superficial injury of other parts of head | 7 | 2% |
| R262 | Difficulty in walking, not elsewhere classified | 6 | 2% |
| R296 | Repeated falls | 6 | 2% |
| S022 | Fracture of nasal bones | 6 | 2% |
| S400 | Contusion of shoulder and upper arm | 6 | 2% |
| G409 | Epilepsy, unspecified | 5 | 1% |
| S108 | Superficial injury of other parts of neck | 5 | 1% |
| T009 | Multiple superficial injuries, unspecified | 5 | 1% |
| R51 | Headache | 4 | 1% |
| R55 | Syncope and collapse | 4 | 1% |
| S005 | Superficial injury of lip and oral cavity | 4 | 1% |
| S007 | Multiple superficial injuries of head | 4 | 1% |
| S009 | Superficial injury of head, part unspecified | 4 | 1% |
| S01 | Open wound of head | 4 | 1% |
| S012 | Open wound of nose | 4 | 1% |
| S420 | Fracture of clavicle | 4 | 1% |
| R529 | Pain, unspecified | 3 | 1% |
| R53+ | Malaise and fatigue | 3 | 1% |
| S001 | Contusion of eyelid and periocular area | 3 | 1% |
| S013 | Open wound of ear | 3 | 1% |
| S014 | Open wound of cheek and temporomandibular area | 3 | 1% |
| S023 | Fracture of orbital floor | 3 | 1% |
| S202 | Contusion of thorax | 3 | 1% |
| S223 | Fracture of rib | 3 | 1% |
| S801 | Contusion of other and unspecified parts of lower leg | 3 | 1% |
| S808 | Other superficial injuries of lower leg | 3 | 1% |
| J180 | Bronchopneumonia, unspecified | 2 | 1% |
| R074 | Chest pain, unspecified | 2 | 1% |
| R104 | Other and unspecified abdominal pain | 2 | 1% |
| R11 | Nausea and vomiting | 2 | 1% |
| R568 | Other and unspecified convulsions | 2 | 1% |
| S017 | Multiple open wounds of head | 2 | 1% |
| S025 | Fracture of tooth | 2 | 1% |
| S061 | Traumatic cerebral oedema | 2 | 1% |
| S16 | Injury of muscles and tendons at neck level | 2 | 1% |
| S300 | Contusion of lower back and pelvis | 2 | 1% |
| S390 | Injury of muscles and tendons of abdomen, lower back and pelvis | 2 | 1% |
| S525 | Fracture of lower end of radius | 2 | 1% |
| S720 | Fracture of head and neck of femur | 2 | 1% |
| S723 | Fracture of shaft of femur | 2 | 1% |
| S908 | Other superficial injuries of ankle and foot | 2 | 1% |
| T741 | Physical abuse, confirmed | 2 | 1% |
| Z045 | Examination and observation following other inflicted injury | 2 | 1% |
| Z532 | Procedure and treatment not carried out because of patient's decision for other and unspecified reasons | 2 | 1% |
| A509 | Congenital syphilis, unspecified | 1 | 0% |
| B349 | Viral infection, unspecified | 1 | 0% |
| E871 | Hypo-osmolality and hyponatraemia | 1 | 0% |
| F103 | Mental and behavioural disorders due to use of alcohol Withdrawal state. | 1 | 0% |
| F430 | Acute stress reaction | 1 | 0% |
| F603 | Emotionally unstable personality disorder | 1 | 0% |
| G404 | Other generalized epilepsy and epileptic syndromes | 1 | 0% |
| G408 | Other epilepsy | 1 | 0% |
| G439 | Migraine, unspecified | 1 | 0% |
| G452 | Multiple and bilateral precerebral artery syndromes | 1 | 0% |
| G938 | Other specified disorders of brain | 1 | 0% |
| G952 | Cord compression, unspecified | 1 | 0% |
| I440 | Atrioventricular block, first degree | 1 | 0% |
| I499 | Cardiac arrhythmia, unspecified | 1 | 0% |
| I608 | Other subarachnoid haemorrhage | 1 | 0% |
| I639 | Cerebral infarction, unspecified | 1 | 0% |
| I951 | Orthostatic hypotension | 1 | 0% |
| J189 | Pneumonia, unspecified | 1 | 0% |
| J34 | Other disorders of nose and nasal sinuses | 1 | 0% |
| J848 | Other specified interstitial pulmonary diseases | 1 | 0% |
| J960 | Acute respiratory failure | 1 | 0% |
| K131 | Cheek and lip biting | 1 | 0% |
| M009 | Pyogenic arthritis, unspecified | 1 | 0% |
| M436 | Torticollis | 1 | 0% |
| M482 | Kissing spine | 1 | 0% |
| M495 | Collapsed vertebra in diseases classified elsewhere | 1 | 0% |
| M501 | Cervical disc disorder with radiculopathy | 1 | 0% |
| M548 | Other dorsalgia | 1 | 0% |
| M628 | Other specified disorders of muscle | 1 | 0% |
| M796 | Pain in limb | 1 | 0% |
| N178 | Other acute renal failure | 1 | 0% |
| N410 | Acute prostatitis | 1 | 0% |
| R060 | Dyspnoea | 1 | 0% |
| R18 | Ascites | 1 | 0% |
| R33 | Retention of urine | 1 | 0% |
| R402 | Coma, unspecified | 1 | 0% |
| R410 | Disorientation, unspecified | 1 | 0% |
| R451 | Restlessness and agitation | 1 | 0% |
| R509 | Fever, unspecified | 1 | 0% |
| R520 | Acute pain | 1 | 0% |
| R53 | Malaise and fatigue | 1 | 0% |
| R579 | Shock, unspecified | 1 | 0% |
| R651 | Systemic Inflammatory Response Syndrome of infectious origin with organ failure | 1 | 0% |
| S026 | Fracture of mandible | 1 | 0% |
| S028 | Fractures of other skull and facial bones | 1 | 0% |
| S031 | Dislocation of septal cartilage of nose | 1 | 0% |
| S051 | Contusion of eyeball and orbital tissues | 1 | 0% |
| S063 | Focal brain injury | 1 | 0% |
| S065 | Traumatic subdural haemorrhage | 1 | 0% |
| S066 | Traumatic subarachnoid haemorrhage | 1 | 0% |
| S071 | Crushing injury of skull | 1 | 0% |
| S092 | Traumatic rupture of ear drum | 1 | 0% |
| S119 | Open wound of neck, part unspecified | 1 | 0% |
| S129 | Fracture of neck, unspecified | 1 | 0% |
| S208 | Superficial injury of other and unspecified parts of thorax | 1 | 0% |
| S222 | Fracture of sternum | 1 | 0% |
| S224 | Multiple fractures of ribs | 1 | 0% |
| S298 | Other specified injuries of thorax | 1 | 0% |
| S301 | Contusion of abdominal wall | 1 | 0% |
| S360 | Injury of spleen | 1 | 0% |
| S408 | Other superficial injuries of shoulder and upper arm | 1 | 0% |
| S422 | Fracture of upper end of humerus | 1 | 0% |
| S423 | Fracture of shaft of humerus | 1 | 0% |
| S429 | Fracture of shoulder girdle, part unspecified | 1 | 0% |
| S501 | Contusion of forearm | 1 | 0% |
| S508 | Other superficial injuries of forearm | 1 | 0% |
| S520 | Fracture of upper end of ulna | 1 | 0% |
| S618 | Open wound of other parts of wrist and hand | 1 | 0% |
| S628 | Fracture of other and unspecified parts of wrist and hand | 1 | 0% |
| S635 | Sprain and strain of wrist | 1 | 0% |
| S636 | Sprain and strain of finger(s) | 1 | 0% |
| S697 | Multiple injuries of wrist and hand | 1 | 0% |
| S711 | Open wound of thigh | 1 | 0% |
| S800 | Contusion of knee | 1 | 0% |
| S817 | Multiple open wounds of lower leg | 1 | 0% |
| S818 | Open wound of other parts of lower leg | 1 | 0% |
| S822 | Fracture of shaft of tibia | 1 | 0% |
| S823 | Fracture of lower end of tibia | 1 | 0% |
| S826 | Fracture of lateral malleolus | 1 | 0% |
| S834 | Sprain of collateral ligament of knee | 1 | 0% |
| S900 | Contusion of ankle | 1 | 0% |
| S901 | Contusion of toe(s) without damage to nail | 1 | 0% |
| S903 | Contusion of other and unspecified parts of foot | 1 | 0% |
| S911 | Open wound of toe(s) without damage to nail | 1 | 0% |
| S934 | Sprain and strain of ankle | 1 | 0% |
| T08+ | Fracture of spine, level unspecified | 1 | 0% |
| T139 | Unspecified injury of lower limb, level unspecified | 1 | 0% |
| T424 | Poisoning: Benzodiazepines | 1 | 0% |
| T671 | Heat syncope | 1 | 0% |
| V092 | Pedestrian injured in traffic accident involving other and unspecified motor vehicles | 1 | 0% |
| V441 | Car passenger injured in collision with heavy transport vehicle or bus in nontraffic accident | 1 | 0% |
| V493 | Car occupant (driver) (passenger) injured in unspecified nontraffic accident | 1 | 0% |
| V892 | Person injured in unspecified motor-vehicle accident, traffic | 1 | 0% |
| W010 | Fall on same level from slipping, tripping and stumbling without subsequent striking against object | 1 | 0% |
| W180 | Fall due to bumping against object | 1 | 0% |
| W188 | Other fall on same level | 1 | 0% |
| W190 | Unspecified fall | 1 | 0% |
| Y040 | Assault by unarmed brawl or fight | 1 | 0% |
| Y049 | Assault by bodily force not specified | 1 | 0% |
| Y080 | Assault by strike by sport equipment | 1 | 0% |
| Z519 | Medical care, unspecified | 1 | 0% |
| Z711 | Person with feared health complaint in whom no diagnosis is made | 1 | 0% |
| Z921 | Personal history of long-term (current) use of anticoagulants | 1 | 0% |

# Appendix 7: Definition of all the algorithms tested during the optimization process for identifying mTBI cases defined with the ‘narrow’ definition

| **Algorithms** | **Definition** |
| --- | --- |
| BA6 | S06.0 or S02.9 or S06.8 |
| BA6_S00 | BA6 or S00.0 or S00.7 or S00.9 |
| BA6_S09 | BA6 or S09.2 |
| BA6_S06 | BA6 or S06.1 or S06.5 or S06.6 |
| BA6_S01 | BA6 or S01.0 or S01.1 or S01.5 |
| BA6_S13 | BA6 or S13.4 |
| BA6_OPT1 | BA6 or S00.0 or S00.7 or S00.9 |
| BA6_OPT2 | BA6 or S09.2 |
| BA6_OPT3 | BA6 or S06.1 or S06.5 or S06.6 |
| BA6_OPT4 | BA6 or S00.0 or S00.7 or S00.9 or S06.1 or S06.5 or S06.6 |
| BA6_OPT5 | BA6 or S00.0 or S00.7 or S00.9 or S09.2 |
| BA6_OPT6 | BA6 or S06.1 or S06.5 or S06.6 or S09.2 |
| BA6_OPT7 | BA6 or S00.0 or S00.7 or S00.9 or S06.1 or S06.5 or S06.6 or S09.2 |

# Appendix 8: Definition of all the of all the algorithms tested during the optimization process for identifying mTBI cases defined with the ‘moderate’ definition

|  |  |
| --- | --- |
| **Algorithms** | **Definition** |
| BA17 | S06.0 or S02.9 or S06.8 or S09.9 |
| BA17_S00_RES* | BA17 or S00.0 or S00.7 or S00.9 |
| BA17_S06_RES* | BA17 or S06.1 or S06.5 or S06.6 |
| BA17_S00 | BA17 or S00.0 or S00.3 or S00.7 or S00.8 or S00.9 |
| BA17_S13 | BA17 or S13.4 |
| BA17_S02 | BA17 or S02.2 or S02.3 |
| BA17_S06 | BA17 or S06.1 or S06.5 or S06.6 |
| BA17_S01 | BA17 or S01.0 or S01.1 or S01.5 or S01.8 or S01.9 |
| BA17_S12 | BA17 or S12.9 |
| BA17_S09 | BA17 or S09.2 |
| BA17_OPT1 | BA17 or S00.0 or S00.7 or S00.9 |
| BA17_OPT2 | BA17 or S12.9 |
| BA17_OPT3 | BA17 or S09.2 |
| BA17_OPT4 | BA17 or S06.1 or S06.5 or S06.6 |
| BA17_OPT5 | BA17 or S02.2 or S02.3 |
| BA17_OPT6 | BA17 or S00.0 or S00.7 or S00.9 or S02.2 or S02.3 |
| BA17_OPT7 | BA17 or S00.0 or S00.7 or S00.9 or S12.9 |
| BA17_OPT8 | BA17 or S00.0 or S00.7 or S00.9 or S09.2 |
| BA17_OPT9 | BA17 or S00.0 or S00.7 or S00.9 S06.1 or S06.5 or S06.6 |
| BA17_OPT10 | BA17 or S02.2 or S02.3 S06.1 or S06.5 or S06.6 |
| BA17_OPT11 | BA17 or S02.2 or S02.3 or S12.9 |
| BA17_OPT12 | BA17 or S02.2 or S02.3 or S09.2 |
| BA17_OPT13 | BA17 or S06.1 or S06.5 or S06.6 or S09.2 |
| BA17_OPT14 | BA17 or S06.1 or S06.5 or S06.6 or S12.9 |
| BA17_OPT15 | BA17 or S09.2 S12.9 |
| BA17_OPT16 | BA17 or S00.0 or S00.7 or S00.9 S02.2 or S02.3 S06.1 or S06.5 or S06.6 |
| BA17_OPT17 | BA17 or S00.0 or S00.7 or S00.9 S02.2 or S02.3 S12.9 |
| BA17_OPT18 | BA17 or S00.0 or S00.7 or S00.9 S02.2 or S02.3 S09.2 |
| BA17_OPT19 | BA17 or S00.0 or S00.7 or S00.9 S06.1 or S06.5 or S06.6 S09.2 |
| BA17_OPT20 | BA17 or S00.0 or S00.7 or S00.9 S06.1 or S06.5 or S06.6 S12.9 |
| BA17_OPT21 | BA17 or S00.0 or S00.7 or S00.9 or S09.2 or S12.9 |
| BA17_OPT22 | BA17 or S02.2 or S02.3 S09.2 S12.9 |
| BA17_OPT23 | BA17 or S02.2 or S02.3 or S09.2 S06.1 or S06.5 or S06.6 |
| BA17_OPT24 | BA17 or S02.2 or S02.3 or S12.9 S06.1 or S06.5 or S06.6 |
| BA17_OPT25 | BA17 or S09.2 or S12.9 or S06.1 or S06.5 or S06.6 |
| BA17_OPT26 | BA17 or S00.0 or S00.7 or S00.9 S02.2 or S02.3 S06.1 or S06.5 or S06.6 or S09.2 |
| BA17_OPT27 | BA17 or S00.0 or S00.7 or S00.9 S02.2 or S02.3 S06.1 or S06.5 or S06.6 or S12.9 |
| BA17_OPT28 | BA17 or S00.0 or S00.7 or S00.9 S02.2 or S02.3 S09.2 S12.9 |
| BA17_OPT29 | BA17 or S00.0 or S00.7 or S00.9 S06.1 or S06.5 or S06.6 S09.2 or S12.9 |
| BA17_OPT30 | BA17 or S02.2 or S02.3 S06.1 or S06.5 or S06.6 S09.2 or S12.9 |
| BA17_OPT31 | BA17 or S00.0 or S00.7 or S00.9 S02.2 or S02.3 S06.1 or S06.5 or S06.6 or S09.2 or S12.9 |

# * Algorithms ending with the suffix _RES include false-negative ICD-10 codes belonging to a given ICD-10 subchapter, included in the best optimised ‘narrow’ mTBI algorithm

# Appendix 9: Definition of all the algorithms tested during the optimization process for identifying mTBI cases defined with the ‘broad’ definition

| **Algorithms** | **Definition** |
| --- | --- |
| BA31 | S06.0 or S02.9 or S06.8 or S06.9 or S09.8 or S09.9 |
| BA31_S00 | BA31 or S00.0 OR S00.1 or S00.3 or S00.5 or S00.7 or S00.8 or S00.9 |
| BA31_S01 | BA31 or S01 or S01.0 or S01.1 or S01.2 or S01.3 or S01.4 or S01.5 or S01.7 or S01.8 or S01.9 |
| BA31_S03 | BA31 or S03.1 |
| BA31_S05 | BA31 or S05.1 |
| BA31_S06 | BA31 or S06.1 or S06.3 or S06.5 or S06.6 |
| BA31_S09 | BA31 or S09.2 |
| BA31_S10 | BA31 or S10.8 |
| BA31_S11 | BA31 or S11.9 |
| BA31_S12 | BA31 or S12.9 |
| BA31_S13 | BA31 or S13.4 |
| BA31_S16 | BA31 or S16 |
| BA31_S02 | BA31 or S02.2 or S02.3 or S02.5 or S02.6 or S02.8 |
| BA31_OPT1 | BA31 or S00.0 OR S00.1 or S00.3 or S00.5 or S00.7 or S00.8 or S00.9 or S01 or S01.0 or S01.1 or S01.2 or S01.3 or S01.4 or S01.5 or S01.7 or S01.8 or S01.9 or S03.1 or S05.1 or S06.1 or S06.3 or S06.5 or S06.6 or S09.2 or S10.8 or S11.9 or S12.9 or S13.4 or S16 or S02.2 or S02.3 or S02.5 or S02.6 or S02.8 |

# Appendix 10: Performance of all the BA6 algorithms with the addition of the various ‘false negative’ ICD-10 codes (i.e., optimized algorithms)

| **ICD algorithm** | **True positives** | **False negatives** | **False positives** | **True negatives** | **Sensitivity** | **Specificity** | **PPV** | **NPV** |
| --- | --- | --- | --- | --- | --- | --- | --- | --- |
|  | **(n)** | **(n)** | **(n)** | **(n)** | **% (95% CI)** | **% (95% CI)** | **% (95% CI)** | **% (95% CI)** |
| BA6 | 17 | 27 | 131 | 5010 | 38.6 (45.5-75.6) | 97.5 (97-97.9) | 11.5 (6.8-17.8) | 99.5 (99.2-99.7) |
| **BA6_S00** | **24** | **20** | **148** | **4993** | **54.5 (38.9-69.6)** | **97.1 (96.6-97.6)** | **14 (9.2-20.1)** | **99.6 (99.4-99.8)** |
| **BA6_S06** | **21** | **23** | **132** | **5009** | **47.7 (32.5-63.3)** | **97.4 (97-97.9)** | **13.7 (8.7-20.2)** | **99.5 (99.3-99.7)** |
| BA6_S01 | 20 | 24 | 193 | 4948 | 45.5 (30.4-61.2) | 96.2 (95.7-96.8) | 9.4 (5.8-14.1) | 99.5 (99.3-99.7) |
| **BA6_S09** | **18** | **26** | **132** | **5009** | **40.9 (26.3-56.8)** | **97.4 (97-97.9)** | **12 (7.3-18.3)** | **99.5 (99.2-99.7)** |
| BA6_S13 | 18 | 26 | 142 | 4999 | 40.9 (26.3-56.8) | 97.2 (96.8-97.7) | 11.3 (6.8-17.2) | 99.5 (99.2-99.7) |

# Algorithms with higher PPVs than those of the BA6 algorithm are shown in bold.

# Appendix 11: Performance of all the BA17 algorithms with the addition of the various “false negative” ICD-10 codes (i.e., optimized algorithms)

| **ICD agorithm** | **True postitives** | **False negatives** | **False positives** | **True negatives** | **Sensitivity** | **Specificity** | **PPV** | **NPV** |
| --- | --- | --- | --- | --- | --- | --- | --- | --- |
|  | **(n)** | **(n)** | **(n)** | **(n)** | **% (95% CI)** | **% (95% CI)** | **% (95% CI)** | **% (95% CI)** |
| BA17 | 54 | 96 | 97 | 4938 | 36 (28.3-44.2) | 98.1 (97.7-98.4) | 35.8 (28.1-44) | 98.1 (97.7-98.5) |
| **BA17_S00_RES** | **64** | **86** | **111** | **4924** | **42.7 (34.6-51)** | **97.8 (97.4-98.2)** | **36.6 (29.4-44.2)** | **98.3 (97.9-98.6)** |
| **BA17_S06_RES** | **58** | **92** | **98** | **4937** | **38.7 (30.8-47)** | **98.1 (97.6-98.4)** | **37.2 (29.6-45.3)** | **98.2 (97.8-98.5)** |
| BA17_S00 | 66 | 84 | 125 | 4910 | 44 (35.9-52.3) | 97.5 (97.1-97.9) | 34.6 (27.8-41.8) | 98.3 (97.9-98.7) |
| BA17_S13 | 58 | 92 | 105 | 4930 | 38.7 (30.8-47) | 97.9 (97.5-98.3) | 35.6 (28.3-43.5) | 98.2 (97.8-98.5) |
| **BA17_S02** | **58** | **92** | **103** | **4932** | **38.7 (30.8-47)** | **98 (97.5-98.3)** | **36 (28.6-44)** | **98.2 (97.8-98.5)** |
| **BA17_S06** | **58** | **92** | **98** | **4937** | **38.7 (30.8-47)** | **98.1 (97.6-98.4)** | **37.2 (29.6-45.3)** | **98.2 (97.8-98.5)** |
| BA17_S01 | 59 | 91 | 215 | 4820 | 39.3 (31.5-47.6) | 95.7 (95.1-96.3) | 21.5 (16.8-26.9) | 98.1 (97.7-98.5) |
| **BA17_S12** | **55** | **95** | **97** | **4938** | **36.7 (29-44.9)** | **98.1 (97.7-98.4)** | **36.2 (28.6-44.4)** | **98.1 (97.7-98.5)** |
| **BA17_S09** | **55** | **95** | **98** | **4937** | **36.7 (29-44.9)** | **98.1 (97.6-98.4)** | **35.9 (28.4-44.1)** | **98.1 (97.7-98.5)** |

# Algorithms with higher PPVs than that of the BA17 algorithm are shown in bold.

# Appendix 12: Performance of all the BA31 algorithms with the addition of the various “false negative” ICD-10 codes (i.e., optimized algorithms)

| **ICD algorithm** | **True positives** | **False negatives** | **False positives** | **True negatives** | **Sensitivity** | **Specificity** | **PPV** | **NPV** |
| --- | --- | --- | --- | --- | --- | --- | --- | --- |
|  | **(n)** | **(n)** | **(n)** | **(n)** | **% (95% CI)** | **% (95% CI)** | **% (95% CI)** | **% (95% CI)** |
| BA31 | 170 | 358 | 13 | 4644 | 32.2 (28.2-36.4) | 99.7 (99.5-99.9) | 92.9 (88.2-96.2) | 92.8 (92.1-93.5) |
| BA31_S00 | 217 | 311 | 13 | 4644 | 41.1 (36.9-45.4) | 99.7 (99.5-99.9) | 94.3 (90.5-97) | 93.7 (93-94.4) |
| BA31_S01 | 296 | 232 | 24 | 4633 | 56.1 (51.7-60.3) | 99.5 (99.2-99.7) | 92.5 (89.1-95.1) | 95.2 (94.6-95.8) |
| BA31_S03 | 171 | 357 | 13 | 4644 | 32.4 (28.4-36.6) | 99.7 (99.5-99.9) | 92.9 (88.2-96.2) | 92.9 (92.1-93.6) |
| BA31_S05 | 171 | 357 | 16 | 4641 | 32.4 (28.4-36.6) | 99.7 (99.4-99.8) | 91.4 (86.5-95) | 92.9 (92.1-93.6) |
| BA31_S06 | 175 | 353 | 14 | 4643 | 33.1 (29.1-37.3) | 99.7 (99.5-99.8) | 92.6 (87.9-95.9) | 92.9 (92.2-93.6) |
| BA31_S09 | 171 | 357 | 14 | 4643 | 32.4 (28.4-36.6) | 99.7 (99.5-99.8) | 92.4 (87.6-95.8) | 92.9 (92.1-93.6) |
| BA31_S10 | 175 | 353 | 14 | 4643 | 33.1 (29.1-37.3) | 99.7 (99.5-99.8) | 92.6 (87.9-95.9) | 92.9 (92.2-93.6) |
| BA31_S11 | 171 | 357 | 13 | 4644 | 32.4 (28.4-36.6) | 99.7 (99.5-99.9) | 92.9 (88.2-96.2) | 92.9 (92.1-93.6) |
| BA31_S12 | 171 | 357 | 13 | 4644 | 32.4 (28.4-36.6) | 99.7 (99.5-99.9) | 92.9 (88.2-96.2) | 92.9 (92.1-93.6) |
| BA31_S13 | 178 | 350 | 17 | 4640 | 33.7 (29.7-37.9) | 99.6 (99.4-99.8) | 91.3 (86.4-94.8) | 93 (92.2-93.7) |
| BA31_S16 | 172 | 356 | 13 | 4644 | 32.6 (28.6-36.8) | 99.7 (99.5-99.9) | 93 (88.3-96.2) | 92.9 (92.1-93.6) |

# As the addition of all the false-negative codes increased sensitivity without affecting PPV below 90%, all the ICD-10 false-negative codes were included in the optimised algorithm.

# Appendix 13: Performance of all the optimized algorithms tested for identifying mTBI cases defined with the ‘narrow’ definition

| **ICD algorithm** | **True positives** | **False negatives** | **False positives** | **True negatives** | **Sensitivity** | **Specificity** | **PPV** | **NPV** |
| --- | --- | --- | --- | --- | --- | --- | --- | --- |
|  | **(n)** | **(n)** | **(n)** | **(n)** | **% (95% CI)** | **% (95% CI)** | **% (95% CI)** | **% (95% CI)** |
| BA6 | 17 | 27 | 131 | 5010 | 38.6 (45.5-75.6) | 97.5 (97-97.9) | 11.5 (6.8-17.8) | 99.5 (99.2-99.7) |
| BA6_OPT1 | 24 | 20 | 148 | 4993 | 54.5 (38.9-69.6) | 97.1 (96.6-97.6) | 14 (9.2-20.1) | 99.6 (99.4-99.8) |
| BA6_OPT2 | 18 | 26 | 132 | 5009 | 40.9 (26.3-56.8) | 97.4 (97-97.9) | 12 (7.3-18.3) | 99.5 (99.2-99.7) |
| BA6_OPT3 | 21 | 23 | 132 | 5009 | 47.7 (32.5-63.3) | 97.4 (97-97.9) | 13.7 (8.7-20.2) | 99.5 (99.3-99.7) |
| **BA6_OPT4** | **28** | **16** | **149** | **4992** | **63.6 (47.8-77.6)** | **97.1 (96.6-97.5)** | **15.8 (10.8-22.1)** | **99.7 (99.5-99.8)** |
| BA6_OPT5 | 24 | 20 | 149 | 4992 | 54.5 (38.9-69.6) | 97.1 (96.6-97.5) | 13.9 (9.1-19.9) | 99.6 (99.4-99.8) |
| BA6_OPT6 | 22 | 22 | 133 | 5008 | 50 (34.6-65.4) | 97.4 (96.9-97.8) | 14.2 (9.1-20.7) | 99.6 (99.3-99.7) |
| BA6_OPT7 | 28 | 16 | 150 | 4991 | 63.6 (47.8-77.6) | 97.1 (96.6-97.5) | 15.7 (10.7-21.9) | 99.7 (99.5-99.8) |

# The best algorithm is shown in bold.

# Appendix 14: Performance of all the optimized algorithms tested for identifying mTBI cases defined with the ‘moderate’ definition

| **ICD agorithm** | **True positives** | **False negatives** | **False positives** | **True negatives** | **Sensitivity** | **Specificity** | **PPV** | **NPV** |
| --- | --- | --- | --- | --- | --- | --- | --- | --- |
|  | **(n)** | **(n)** | **(n)** | **(n)** | **% (95% CI)** | **% (95% CI)** | **% (95% CI)** | **% (95% CI)** |
| BA17 | 54 | 96 | 97 | 4938 | 36 (28.3-44.2) | 98.1 (97.7-98.4) | 35.8 (28.1-44) | 98.1 (97.7-98.5) |
| BA17_OPT1 | 64 | 86 | 111 | 4924 | 42.7 (34.6-51) | 97.8 (97.4-98.2) | 36.6 (29.4-44.2) | 98.3 (97.9-98.6) |
| BA17_OPT2 | 55 | 95 | 97 | 4938 | 36.7 (29-44.9) | 98.1 (97.7-98.4) | 36.2 (28.6-44.4) | 98.1 (97.7-98.5) |
| BA17_OPT3 | 55 | 95 | 98 | 4937 | 36.7 (29-44.9) | 98.1 (97.6-98.4) | 35.9 (28.4-44.1) | 98.1 (97.7-98.5) |
| BA17_OPT4 | 58 | 92 | 98 | 4937 | 38.7 (30.8-47) | 98.1 (97.6-98.4) | 37.2 (29.6-45.3) | 98.2 (97.8-98.5) |
| BA17_OPT5 | 58 | 92 | 103 | 4932 | 38.7 (30.8-47) | 98 (97.5-98.3) | 36 (28.6-44) | 98.2 (97.8-98.5) |
| BA17_OPT6 | 68 | 82 | 117 | 4918 | 45.3 (37.2-53.7) | 97.7 (97.2-98.1) | 36.8 (29.8-44.1) | 98.4 (98-98.7) |
| BA17_OPT7 | 65 | 85 | 111 | 4924 | 43.3 (35.3-51.7) | 97.8 (97.4-98.2) | 36.9 (29.8-44.5) | 98.3 (97.9-98.6) |
| BA17_OPT8 | 64 | 86 | 112 | 4923 | 42.7 (34.6-51) | 97.8 (97.3-98.2) | 36.4 (29.3-43.9) | 98.3 (97.9-98.6) |
| BA17_OPT9 | 68 | 82 | 112 | 4923 | 45.3 (37.2-53.7) | 97.8 (97.3-98.2) | 37.8 (30.7-45.3) | 98.4 (98-98.7) |
| BA17_OPT10 | 62 | 88 | 104 | 4931 | 41.3 (33.4-49.7) | 97.9 (97.5-98.3) | 37.3 (30-45.2) | 98.2 (97.8-98.6) |
| BA17_OPT11 | 59 | 91 | 103 | 4932 | 39.3 (31.5-47.6) | 98 (97.5-98.3) | 36.4 (29-44.3) | 98.2 (97.8-98.5) |
| BA17_OPT12 | 59 | 91 | 104 | 4931 | 39.3 (31.5-47.6) | 97.9 (97.5-98.3) | 36.2 (28.8-44.1) | 98.2 (97.8-98.5) |
| BA17_OPT13 | 59 | 91 | 99 | 4936 | 39.3 (31.5-47.6) | 98 (97.6-98.4) | 37.3 (29.8-45.4) | 98.2 (97.8-98.5) |
| BA17_OPT14 | 59 | 91 | 98 | 4937 | 39.3 (31.5-47.6) | 98.1 (97.6-98.4) | 37.6 (30-45.7) | 98.2 (97.8-98.5) |
| BA17_OPT15 | 56 | 94 | 98 | 4937 | 37.3 (29.6-45.6) | 98.1 (97.6-98.4) | 36.4 (28.8-44.5) | 98.1 (97.7-98.5) |
| BA17_OPT16 | 72 | 78 | 118 | 4917 | 48 (39.8-56.3) | 97.7 (97.2-98.1) | 37.9 (31-45.2) | 98.4 (98.1-98.8) |
| BA17_OPT17 | 69 | 81 | 117 | 4918 | 46 (37.8-54.3) | 97.7 (97.2-98.1) | 37.1 (30.1-44.5) | 98.4 (98-98.7) |
| BA17_OPT18 | 68 | 82 | 118 | 4917 | 45.3 (37.2-53.7) | 97.7 (97.2-98.1) | 36.6 (29.6-43.9) | 98.4 (98-98.7) |
| BA17_OPT19 | 68 | 82 | 113 | 4922 | 45.3 (37.2-53.7) | 97.8 (97.3-98.2) | 37.6 (30.5-45.1) | 98.4 (98-98.7) |
| BA17_OPT20 | 69 | 81 | 112 | 4923 | 46 (37.8-54.3) | 97.8 (97.3-98.2) | 38.1 (31-45.6) | 98.4 (98-98.7) |
| BA17_OPT21 | 65 | 85 | 112 | 4923 | 43.3 (35.3-51.7) | 97.8 (97.3-98.2) | 36.7 (29.6-44.3) | 98.3 (97.9-98.6) |
| BA17_OPT22 | 60 | 90 | 104 | 4931 | 40 (32.1-48.3) | 97.9 (97.5-98.3) | 36.6 (29.2-44.5) | 98.2 (97.8-98.6) |
| BA17_OPT23 | 63 | 87 | 105 | 4930 | 42 (34-50.3) | 97.9 (97.5-98.3) | 37.5 (30.2-45.3) | 98.3 (97.9-98.6) |
| BA17_OPT24 | 63 | 87 | 104 | 4931 | 42 (34-50.3) | 97.9 (97.5-98.3) | 37.7 (30.4-45.5) | 98.3 (97.9-98.6) |
| BA17_OPT25 | 60 | 90 | 99 | 4936 | 40 (32.1-48.3) | 98 (97.6-98.4) | 37.7 (30.2-45.8) | 98.2 (97.8-98.6) |
| BA17_OPT26 | 72 | 78 | 119 | 4916 | 48 (39.8-56.3) | 97.6 (97.2-98) | 37.7 (30.8-45) | 98.4 (98.1-98.8) |
| **BA17_OPT27** | **73** | **77** | **118** | **4917** | **48.7 (40.4-57)** | **97.7 (97.2-98.1)** | **38.2 (31.3-45.5)** | **98.5 (98.1-98.8)** |
| BA17_OPT28 | 69 | 81 | 118 | 4917 | 46 (37.8-54.3) | 97.7 (97.2-98.1) | 36.9 (30-44.3) | 98.4 (98-98.7) |
| BA17_OPT29 | 69 | 81 | 113 | 4922 | 46 (37.8-54.3) | 97.8 (97.3-98.2) | 37.9 (30.8-45.4) | 98.4 (98-98.7) |
| BA17_OPT30 | 64 | 86 | 105 | 4930 | 42.7 (34.6-51) | 97.9 (97.5-98.3) | 37.9 (30.5-45.6) | 98.3 (97.9-98.6) |
| BA17_OPT31 | 73 | 77 | 119 | 4916 | 48.7 (40.4-57) | 97.6 (97.2-98) | 38 (31.1-45.3) | 98.5 (98.1-98.8) |

# The best algorithm is shown in bold.

# Appendix 15: Performance of all the optimized algorithms tested for identifying mTBI cases defined with the ‘broad’ definition

| **ICD algorithm** | **True positives** | **False negatives** | **False positives** | **True negatives** | **Sensitivity** | **Specificity** | **PPV** | **NPV** |
| --- | --- | --- | --- | --- | --- | --- | --- | --- |
|  | **(n)** | **(n)** | **(n)** | **(n)** | **% (95% CI)** | **% (95% CI)** | **% (95% CI)** | **% (95% CI)** |
| BA31 | 170 | 358 | 13 | 4644 | 32.2 (28.2-36.4) | 99.7 (99.5-99.9) | 92.9 (88.2-96.2) | 92.8 (92.1-93.5) |
| **BA31_OPT1** | **370** | **158** | **35** | **4622** | **70.1 (66-74)** | **99.2 (99-99.5)** | **91.4 (88.2-93.9)** | **96.7 (96.2-97.2)** |

# The best algorithm is shown in bold.
